# Supplementary material
Source: MDPI journal article supplement (https://www.mdpi.com/2079-6412/9/8/465)
Supplement: s1 [file s1]

# Supplementary Materials: Application of Photocatalytic Falling Film Reactor to Elucidate the Degradation Pathways of Pharmaceutical Diclofenac and Ibuprofen in Aqueous Solutions

Kosar Hikmat Hama Aziz <sup>1,2,3,\*</sup>, Khalid M. Omer <sup>1,2</sup>, Ali Mahyar <sup>3</sup>, Hans Miessner <sup>3</sup>, Siegfried Mueller <sup>3</sup> and Detlev Moeller <sup>3</sup>

<sup>1</sup> Department of Chemistry, College of Science, University of Sulaimani, Qlyasan Street, Sulaimani City 46001, Kurdistan Region, Iraq; khalid.omer@univsul.edu.iq

<sup>2</sup> Komar research Center (KRC), Komar University of Science and Technology, Sulaimani City 46001, Kurdistan Region, Iraq

<sup>3</sup> Laboratory of Atmospheric Chemistry and Air Quality, Brandenburg University of Technology (BTU Cottbus-Senftenberg), D-12489 Berlin, Germany; alimahyar@gmail.com (A.M.); mie@btu-lc.fta-berlin.de (H.M.); mue@btu-lc.fta-berlin.de (S.M.); moe@btu-lc.fta-berlin.de (D.M.)

\* Correspondence: kosar.hamaaziz@univsul.edu.iq

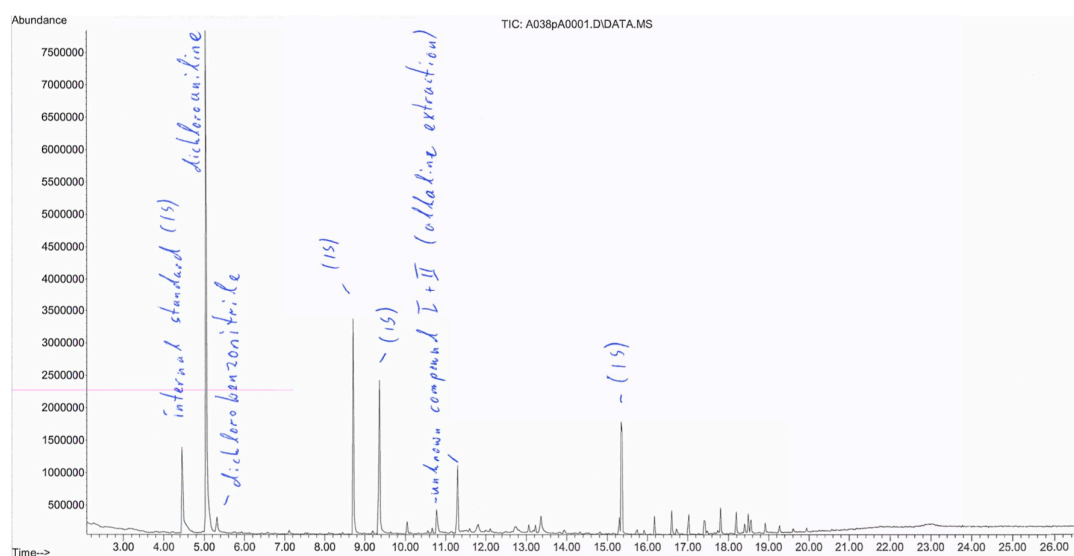

(a)

Figure S1. Cont.

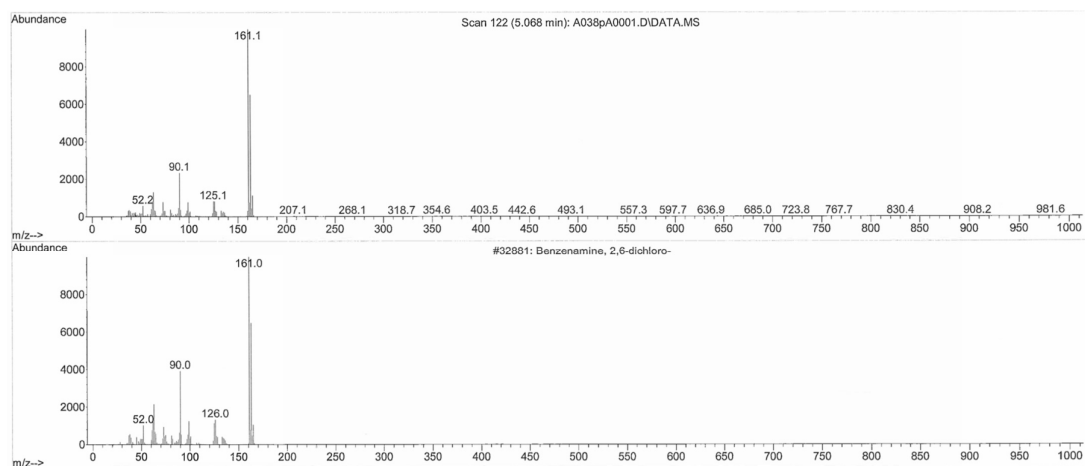

(b)

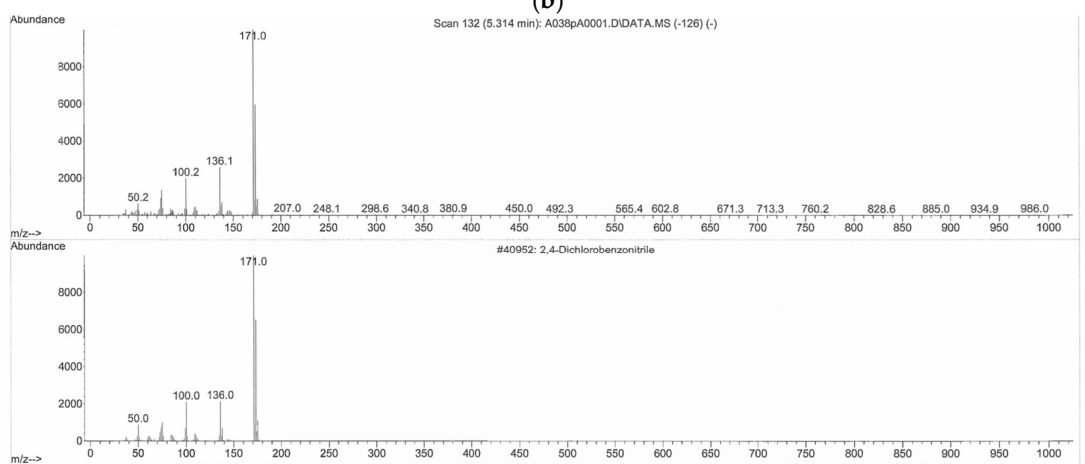

(c)

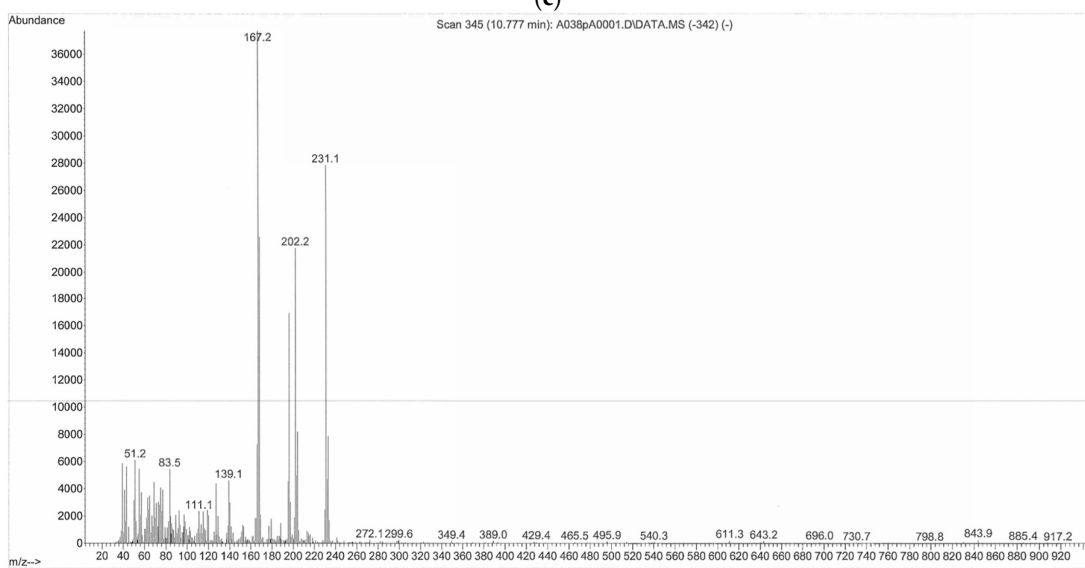

(d)

Figure S1. Cont.

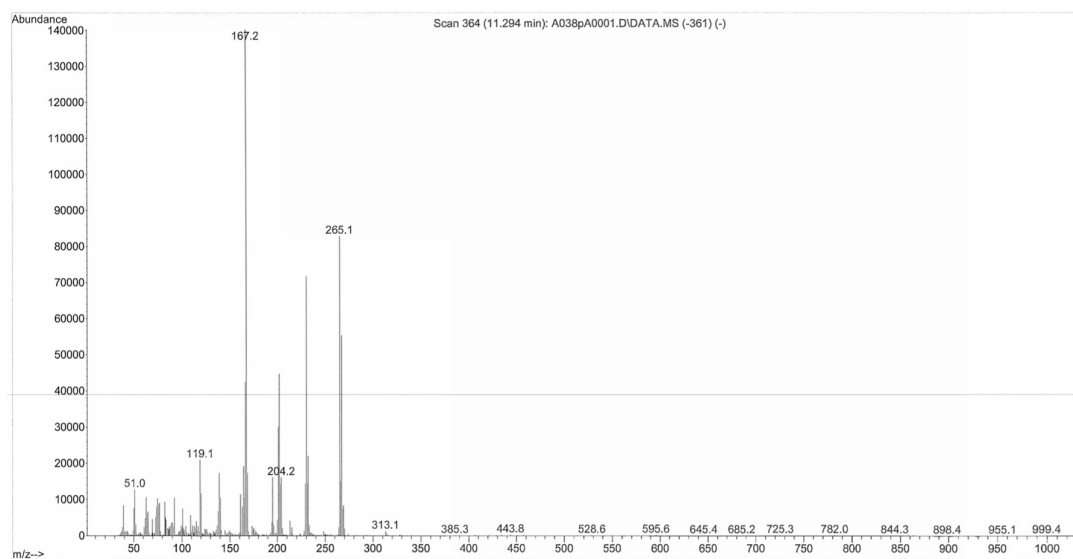

(e)

**Figure S1.** GC/MS chromatogram obtained for photocatalytic degradation of DCF (50 mg/L) under UVA irradiation, the identified degradation intermediates are shown in Table 1. (a) GC/MS chromatogram; (b) 2,6-Dichloroaniline (c) 2,6-Dichlorobenzonitrile, (d) 2-(2-Chlorophenylamino)-benzaldehyde, (e) 2-(2,6-Dichlorophenylamino)-benzaldehyde.

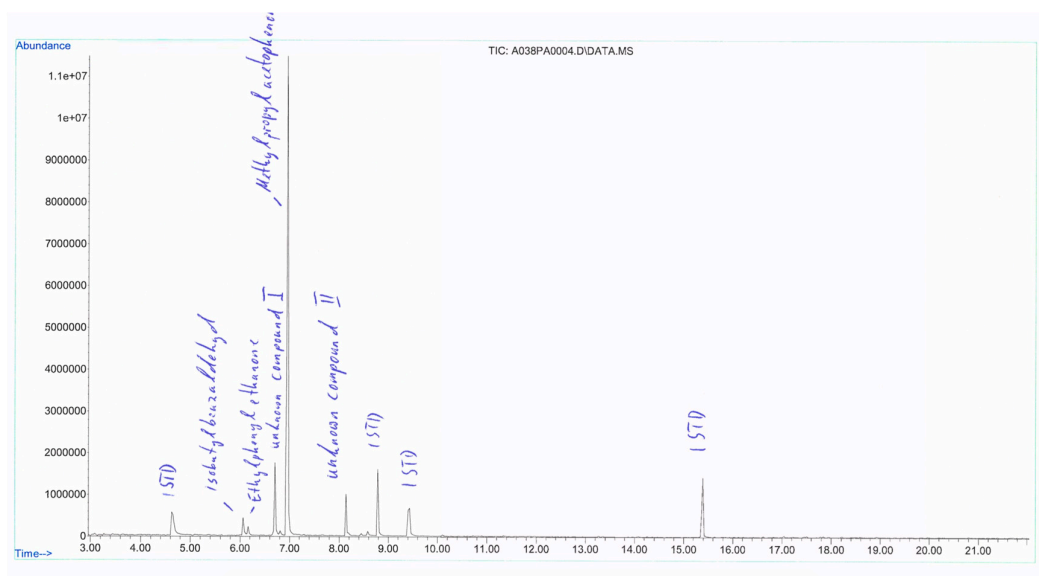

(a)

**Figure S2.** Cont.

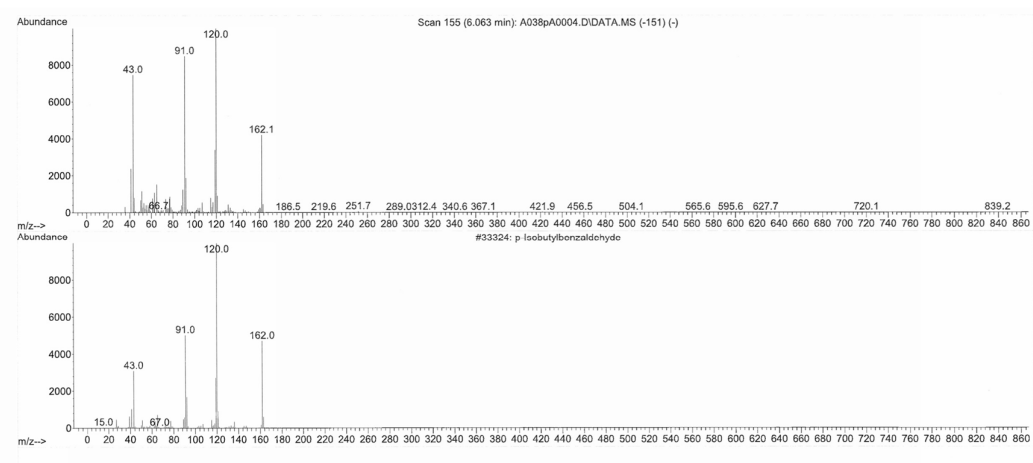

(b)

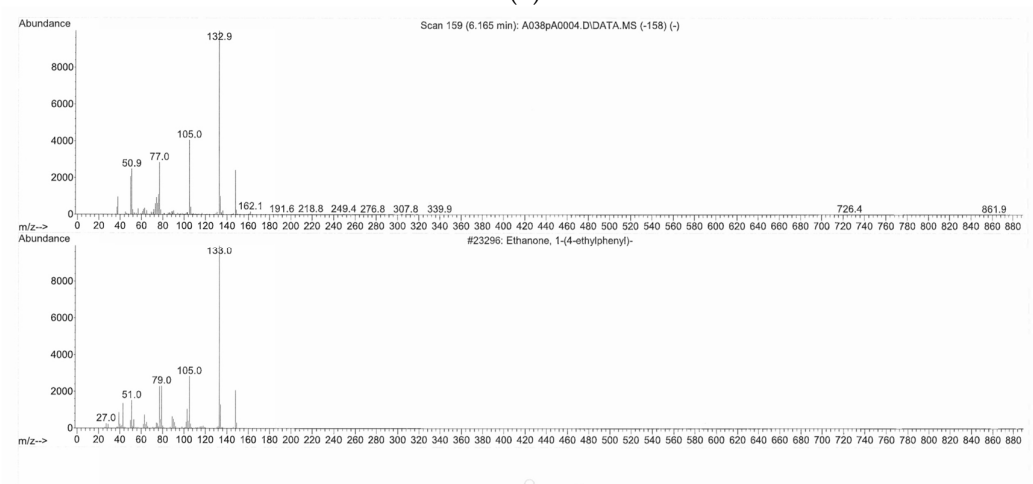

(c)

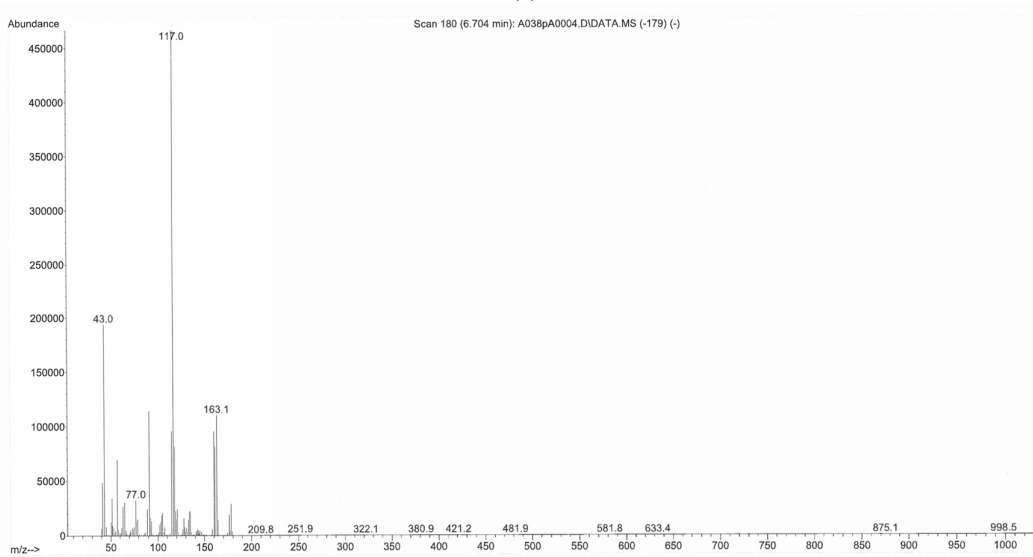

(d)

Figure S2. Cont.

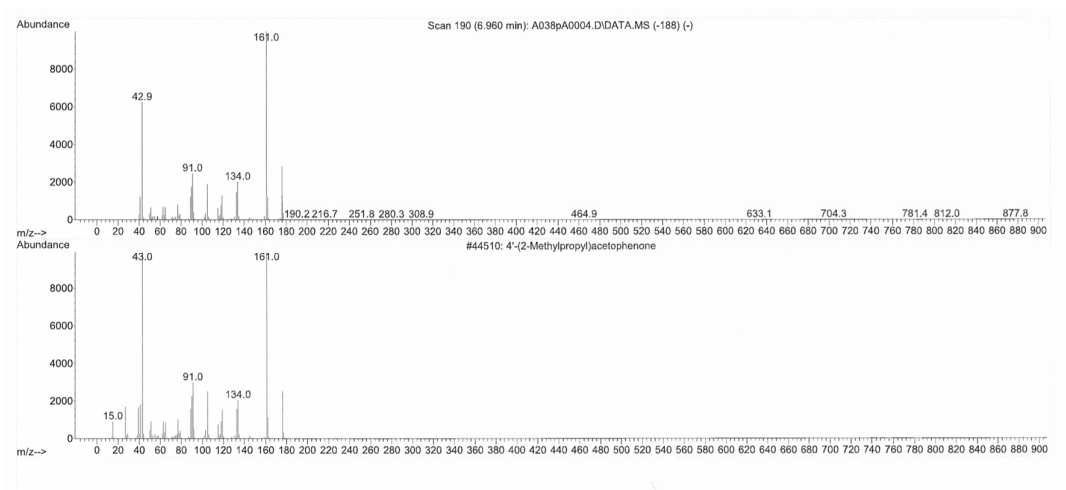

(e)

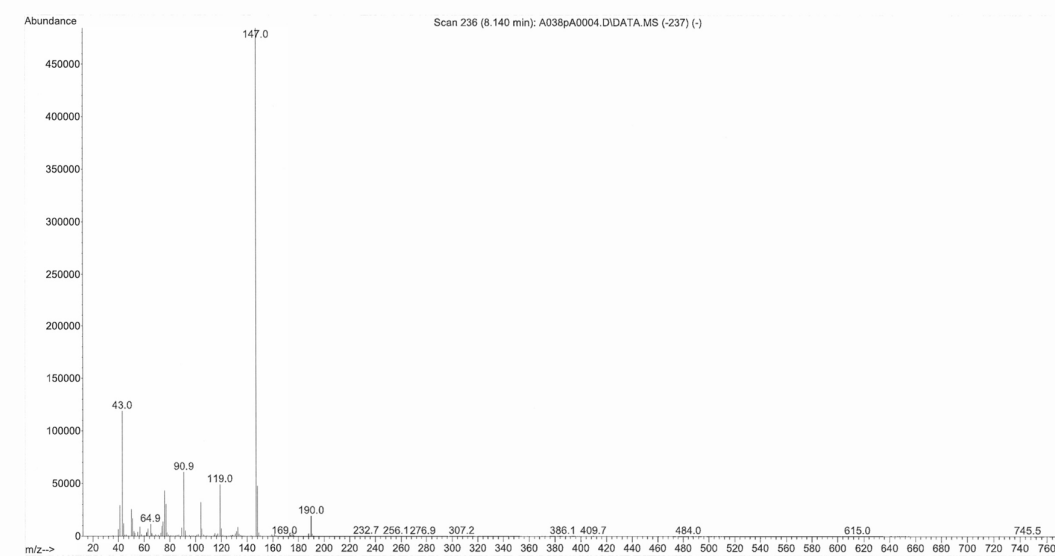

(f)

**Figure S2.** GC/MS chromatogram obtained for photocatalytic degradation of IBP (50 mg/L) under UVA irradiation, the identified degradation intermediates are shown in Table 2. (a) GC/MS chromatogram, (b) 4-Isobutylbenzaldehyde, (c) 4-Isopropylbenzaldehyde, (d) 4-Ethylacetophenone, (e) 4-Isobutylacetophenone, (f) 4-(1-carboxyethyl)benzoic acid.

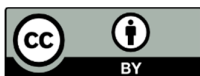

© 2019 by the authors. Submitted for possible open access publication under the terms and conditions of the Creative Commons Attribution (CC BY) license (<http://creativecommons.org/licenses/by/4.0/>).
